# Supplementary material
Source: PubMed Central journal article supplement (PMC7104702)
Supplement: ry191037suppa1.pdf [file ry191037suppa1.pdf]

## Appendix E1

Example of an LCModel control file used in this study. Only common parameters used for all datasets are shown here. Please note that these values should not be considered as a reference for future studies. Control parameters should be always adapted to the data that are being quantified.

```
$LCMODL
.
.
.
DKNTMN = 0.15
DEGZER = 0.0
SDDEGZ = 5.0
DEGPPM = 0.
SDDEGP = 5.0
DOWS = T
SUBBAS = T
NEACH = 99
WDLIN (6) = 0.0
PPMST = 4.0
PPMEND = 0.5
NSIMUL = 12
NCOMBI = 5
CHCOMB (1) = 'PC+GPC'
CHCOMB (2) = 'Cr+PCr'
CHCOMB (3) = 'NAA+NAAG'
CHCOMB (4) = 'Glu+Gln'
CHCOMB (5) = 'Glc+Tau'
NAMREL = 'Cr+PCr'
CONREL = 8.00
DOECC = T (Only for GE and Siemens, Philips spectra were exported already ECC corrected)
.
.
.
$END
```

**Table E1. Hardware and software parameters that were used to collect the MRS data**

| Site ID | Scanner vendor and model | Software release | Tx/Rx hardware            | $B_0$ shimming approach | Phase cycling | Spectral width (Hz) | Data points       | Water suppression |
|---------|--------------------------|------------------|---------------------------|-------------------------|---------------|---------------------|-------------------|-------------------|
| G1      | GE Discovery MR750w      | DV25             | Body coil/32-ch head coil | Double-echo GRE         | 2 steps       | 5000                | 4096              | CHESS             |
| G2      | GE Discovery MR750       | DV24             | Body coil/8-ch head coil  | Double-echo GRE         | 2 steps       | 2000                | 2048              | CHESS             |
| G3      | GE Discovery MR750       | DV24             | Body coil/32-ch head coil | Double-echo GRE         | 8 steps       | 2000                | 2048              | CHESS             |
| G4      | GE Discovery MR750       | DV25             | Body coil/8-ch head coil  | Double-echo GRE         | 8 steps       | 5000                | 4096              | CHESS             |
| G5      | GE Discovery MR750       | DV25             | Body coil/32-ch head coil | Double-echo GRE         | 8 steps       | 2000                | 2048              | CHESS             |
| G6      | GE Signa HDx             | HD16             | Body coil/8-ch head coil  | Double-echo GRE         | 2 steps       | 2000                | 2048              | CHESS             |
| G7      | GE Discovery MR750       | DV24             | Body coil/8-ch head coil  | Double-echo GRE         | 8 steps       | 2000                | 2048              | CHESS             |
| G8      | GE Discovery MR750       | DV24             | Body coil/8-ch head coil  | Double-echo GRE         | 8 steps       | 2000                | 2048              | CHESS             |
| P1      | Philips Achieva          | R5.1.7           | Body coil/32-ch head coil | PB-auto <sup>a</sup>    | 16 steps      | 2000                | 2048              | VAPOR             |
| P2      | Philips Achieva          | R5.1.7           | Body coil/32-ch head coil | PB-auto                 | 16 steps      | 2000                | 2048              | VAPOR             |
| P3      | Philips Achieva          | R3.2.2           | Body coil/32-ch head coil | PB-auto                 | 16 steps      | 2000                | 2048              | VAPOR             |
| P4      | Philips Ingenia CX       | R5.1.7           | Body coil/32-ch head coil | PB-auto                 | 16 steps      | 2000                | 2048              | MOIST             |
| P5      | Philips Achieva TX       | R5.1.7           | Body coil/32-ch head coil | PB-auto                 | 16 steps      | 2000                | 2048              | MOIST             |
| P6      | Philips Achieva          | R3.2.3           | Body coil/8-ch head coil  | PB-auto                 | 16 steps      | 2000                | 2048              | MOIST             |
| P7      | Philips Ingenia          | R5.1.8           | Body coil/32-ch head coil | PB-auto                 | 16 steps      | 2000                | 2048              | VAPOR             |
| P8      | Philips Ingenia CX       | R5.1.8           | Body coil/32-ch head coil | PB-auto                 | 16 steps      | 2000                | 2048              | MOIST             |
| P9      | Philips Achieva          | R5.1.7           | Body coil/32-ch head coil | PB-auto                 | 16 steps      | 2000                | 2048              | VAPOR             |
| P10     | Philips Ingenia          | R5.1.9           | Body coil/15-ch head coil | PB-auto                 | 16 steps      | 2000                | 2048              | MOIST             |
| S1      | Siemens Trio             | VB17             | Body coil/32-ch head coil | 3D-DESS + manual        | 16 steps      | 4000 <sup>b</sup>   | 4096              | CHESS             |
| S2      | Siemens Verio            | VB17             | Body coil/32-ch head coil | 3D-DESS + manual        | 16 steps      | 4000                | 4096              | CHESS             |
| S3      | Siemens Prisma           | VD13             | Body coil/20-ch head coil | FAST (EST)MAP           | 16 steps      | 4000                | 4096              | WET               |
| S4      | Siemens Prisma           | VE11             | Body coil/64-ch head coil | 3D-DESS                 | 16 steps      | 4000                | 4096              | WET               |
| S5      | Siemens Trio             | VB17             | Body coil/12-ch head coil | 3D-DESS                 | 16 steps      | 4000                | 4096              | CHESS             |
| S6      | Siemens Trio             | VB17             | Body coil/32-ch head coil | FAST (EST)MAP           | 16 steps      | 4000                | 4096              | WET               |
| S7      | Siemens Trio             | VB17             | Body coil/32-ch head coil | FAST (EST)MAP           | 16 steps      | 2000                | 2074 <sup>c</sup> | CHESS             |
| S8      | Siemens Prisma           | VE11             | Body coil/64-ch head coil | 3D-DESS                 | 16 steps      | 4000                | 4096              | WET               |

<sup>a</sup> PB-auto is a Philips pencil-beam projection-based method for automatic voxel shimming.

<sup>b</sup> TWIX data are oversampled. For example, if the specified spectral width and number of discrete data points are set at 2000 Hz/2048, the data are oversampled to 4000 Hz/4096.

<sup>c</sup> In the Siemens WIP sequence, extra data points are added before and/or after the detected spin echo if the number of data points is specified as 512 or 1024. The additional points before the spin echo were removed during data processing.

GRE, gradient echo; PB, pencil beam; 3D-DESS, Three-dimensional double-echo steady-state; manual, manual shimming, FAST (EST)MAP, Fast, Automatic Shim Technique using Echo-planar Signal readout for Mapping Along Projections; CHESS, CHEMical Shift Selective; VAPOR, VARIable Power and Optimized Relaxation delays; WET, Water suppression Enhanced through T<sub>1</sub> effects; MOIST, Multiply Optimized Insensitive Suppression Train Rx, receive; Tx, transmit.

**Table E2. Number of datasets that were not quantified for a given metabolite based on the quality criteria**

|                                         | Ala        | Asc        | Asp       | GABA       | Glx      | Glc+Tau   | GSH        | Lac        | ml       | PE         | sl        | tCho     | tCr        | tNAA       |
|-----------------------------------------|------------|------------|-----------|------------|----------|-----------|------------|------------|----------|------------|-----------|----------|------------|------------|
| Count of Not Quant (CRLB > 100%)        | 115        | 53         | 0         | 12         | 0        | 0         | 0          | 15         | 0        | 6          | 3         | 0        | 0          | 0          |
| Percentage of all datasets              | 39.25%     | 18.09%     | 0.00%     | 4.10%      | 0.00%    | 0.00%     | 0.00%      | 5.12%      | 0.00%    | 2.05%      | 1.02%     | 0.00%    | 0.00%      | 0.00%      |
| Count of datasets with CRLB > 50%       | 102        | 26         | 0         | 20         | 0        | 3         | 0          | 31         | 0        | 10         | 2         | 0        | 0          | 0          |
| Percentage of all datasets              | 34.81%     | 8.87%      | 0.00%     | 6.83%      | 0.00%    | 1.02%     | 0.00%      | 10.58%     | 0.00%    | 3.41%      | 0.68%     | 0.00%    | 0.00%      | 0.00%      |
| Mean CRLB ± SD (all quantified spectra) | 55.3 ± 18% | 27.0 ± 18% | 13.2 ± 5% | 33.2 ± 13% | 4.4 ± 1% | 13.8 ± 8% | 55.3 ± 18% | 30.2 ± 16% | 3.6 ± 1% | 20.7 ± 12% | 15.4 ± 8% | 2.6 ± 1% | 1.2 ± 0.5% | 1.6 ± 0.5% |

Alanine (Ala) was not reported because the mean CRLB of all quantified spectra was > 50%.

**Table E3. Site, vendor and total values (mean ± SD) of metabolite/tCr ratios in arbitrary units (a.u.)**

| Site ID             | Asc/tCr            | Asp/tCr            | GABA/tCr           | Glx/tCr             | GSH/tCr            | Glc+Tau/tCr        | Lac/tCr            | ml/tCr             | PE/tCr             | sl/tCr             | tCho/tCr           | tNAA/tCr            |
|---------------------|--------------------|--------------------|--------------------|---------------------|--------------------|--------------------|--------------------|--------------------|--------------------|--------------------|--------------------|---------------------|
| G1                  | 1.02 ± 0.39        | 2.97 ± 0.42        | 1.08 ± 0.31        | 13.19 ± 1.40        | 1.22 ± 0.17        | 2.14 ± 0.63        | 0.81 ± 0.42        | 7.25 ± 0.70        | 1.88 ± 0.60        | 0.25 ± 0.10        | 1.39 ± 0.17        | 11.54 ± 1.39        |
| G2                  | 0.48 ± 0.14        | 2.30 ± 0.39        | 0.89 ± 0.23        | 12.20 ± 1.13        | 1.27 ± 0.18        | 2.12 ± 0.82        | 0.58 ± 0.21        | 6.64 ± 0.46        | 1.99 ± 0.51        | 0.27 ± 0.11        | 1.36 ± 0.11        | 11.31 ± 0.52        |
| G3                  | 0.64 ± 0.22        | 2.71 ± 0.45        | 0.86 ± 0.41        | 12.59 ± 1.04        | 1.32 ± 0.26        | 2.22 ± 0.69        | 0.45 ± 0.08        | 7.05 ± 0.30        | 2.20 ± 0.78        | 0.25 ± 0.15        | 1.44 ± 0.14        | 11.40 ± 0.73        |
| G4                  | 1.03 ± 0.61        | 2.66 ± 0.53        | 0.84 ± 0.28        | 12.65 ± 0.66        | 1.29 ± 0.22        | 2.07 ± 0.42        | 0.56 ± 0.28        | 6.91 ± 0.55        | 1.93 ± 0.49        | 0.28 ± 0.06        | 1.39 ± 0.11        | 11.49 ± 0.59        |
| G5                  | 0.48 ± 0.14        | 2.68 ± 0.56        | 1.01 ± 0.23        | 12.22 ± 0.76        | 1.22 ± 0.14        | 2.13 ± 0.55        | 0.72 ± 0.19        | 6.76 ± 0.49        | 2.06 ± 0.49        | 0.25 ± 0.09        | 1.34 ± 0.09        | 11.22 ± 0.57        |
| G6                  | 0.74 ± 0.35        | 3.53 ± 0.52        | 1.03 ± 0.36        | 15.50 ± 1.08        | 1.88 ± 0.21        | 1.92 ± 0.61        | 0.59 ± 0.24        | 7.22 ± 0.45        | 2.36 ± 0.69        | 0.24 ± 0.13        | 1.53 ± 0.21        | 11.53 ± 0.62        |
| G7                  | 0.96 ± 0.75        | 2.77 ± 0.49        | 0.80 ± 0.19        | 11.81 ± 1.30        | 1.04 ± 0.31        | 2.58 ± 0.66        | 0.73 ± 0.32        | 7.24 ± 0.42        | 1.89 ± 0.76        | 0.21 ± 0.09        | 1.40 ± 0.18        | 11.40 ± 0.61        |
| G8                  | 1.14 ± 0.41        | 2.59 ± 0.60        | 0.71 ± 0.30        | 11.85 ± 1.71        | 1.06 ± 0.32        | 2.61 ± 1.02        | 0.53 ± 0.32        | 7.44 ± 0.66        | 1.98 ± 0.73        | 0.20 ± 0.05        | 1.43 ± 0.10        | 11.35 ± 0.51        |
| <b>GE all</b>       | <b>0.89 ± 0.50</b> | <b>2.78 ± 0.59</b> | <b>0.91 ± 0.30</b> | <b>12.76 ± 1.62</b> | <b>1.28 ± 0.34</b> | <b>2.22 ± 0.71</b> | <b>0.63 ± 0.28</b> | <b>7.06 ± 0.57</b> | <b>2.03 ± 0.62</b> | <b>0.24 ± 0.10</b> | <b>1.41 ± 0.15</b> | <b>11.41 ± 0.72</b> |
| <b>Intersite CV</b> | <b>32.16%</b>      | <b>12.92%</b>      | <b>14.19%</b>      | <b>9.40%</b>        | <b>20.22%</b>      | <b>11.05%</b>      | <b>19.19%</b>      | <b>3.88%</b>       | <b>8.10%</b>       | <b>11.95%</b>      | <b>4.20%</b>       | <b>0.97%</b>        |
| P1                  | 1.55 ± 0.26        | 3.20 ± 0.23        | 0.59 ± 0.10        | 12.32 ± 0.86        | 1.19 ± 0.08        | 3.37 ± 0.44        | 0.57 ± 0.12        | 7.04 ± 0.57        | 2.28 ± 0.52        | 0.35 ± 0.09        | 1.28 ± 0.12        | 11.58 ± 0.85        |
| P2                  | 1.58 ± 0.61        | 3.32 ± 0.28        | 0.71 ± 0.10        | 11.52 ± 0.90        | 1.25 ± 0.13        | 3.18 ± 0.49        | 0.66 ± 0.14        | 7.20 ± 0.44        | 3.46 ± 0.63        | 0.36 ± 0.13        | 1.44 ± 0.11        | 11.02 ± 0.72        |
| P3                  | 0.81 ± 0.38        | 2.19 ± 0.45        | 0.77 ± 0.26        | 11.47 ± 0.94        | 1.31 ± 0.17        | 2.71 ± 0.67        | 0.55 ± 0.18        | 7.13 ± 0.51        | 2.83 ± 0.71        | 0.37 ± 0.09        | 1.33 ± 0.10        | 10.19 ± 1.06        |
| P4                  | 1.42 ± 0.48        | 2.95 ± 0.26        | 0.54 ± 0.12        | 12.10 ± 0.91        | 1.32 ± 0.11        | 3.00 ± 0.77        | 0.67 ± 0.13        | 7.06 ± 0.85        | 3.17 ± 0.58        | 0.32 ± 0.14        | 1.36 ± 0.13        | 10.98 ± 0.67        |
| P5                  | 0.54 ± 0.26        | 3.21 ± 0.27        | 0.60 ± 0.13        | 10.05 ± 0.85        | 1.22 ± 0.29        | 1.91 ± 0.38        | 0.54 ± 0.15        | 6.35 ± 0.42        | 1.88 ± 0.51        | 0.19 ± 0.06        | 1.14 ± 0.17        | 10.71 ± 0.35        |
| P6                  | 2.33 ± 1.84        | 2.59 ± 0.61        | 0.91 ± 0.23        | 11.86 ± 0.86        | 1.58 ± 0.59        | 3.04 ± 1.58        | 0.57 ± 0.18        | 6.23 ± 0.76        | 2.69 ± 0.84        | 0.24 ± 0.05        | 1.28 ± 0.10        | 10.08 ± 0.62        |
| P7                  | 0.65 ± 0.25        | 3.88 ± 0.41        | 0.97 ± 0.52        | 11.68 ± 1.45        | 1.35 ± 0.13        | 2.88 ± 0.61        | 0.57 ± 0.18        | 7.27 ± 0.56        | 3.93 ± 0.99        | 0.36 ± 0.11        | 1.50 ± 0.12        | 11.78 ± 0.61        |
| P8                  | 1.16 ± 0.34        | 3.15 ± 0.24        | 0.55 ± 0.22        | 11.50 ± 0.76        | 1.29 ± 0.08        | 2.60 ± 0.32        | 0.56 ± 0.16        | 7.08 ± 0.43        | 2.85 ± 0.58        | 0.34 ± 0.05        | 1.30 ± 0.05        | 10.59 ± 0.37        |
| P9                  | 0.57 ± 0.24        | 2.79 ± 0.29        | 0.59 ± 0.13        | 10.88 ± 0.61        | 1.38 ± 0.19        | 2.61 ± 0.36        | 0.55 ± 0.11        | 6.76 ± 0.48        | 2.76 ± 0.56        | 0.33 ± 0.08        | 1.36 ± 0.15        | 10.56 ± 0.65        |
| P10                 | 1.63 ± 0.97        | 3.55 ± 0.50        | 0.94 ± 0.35        | 12.72 ± 1.37        | 1.53 ± 0.38        | 2.76 ± 1.17        | 0.59 ± 0.15        | 7.48 ± 0.64        | 3.58 ± 0.91        | 0.25 ± 0.11        | 1.48 ± 0.14        | 11.24 ± 0.50        |

|                     |                    |                    |                    |                     |                    |                    |                    |                    |                    |                    |                    |                     |
|---------------------|--------------------|--------------------|--------------------|---------------------|--------------------|--------------------|--------------------|--------------------|--------------------|--------------------|--------------------|---------------------|
| <b>Philips all</b>  | <b>1.31 ± 0.93</b> | <b>3.08 ± 0.59</b> | <b>0.72 ± 0.29</b> | <b>11.66 ± 1.16</b> | <b>1.35 ± 0.28</b> | <b>2.84 ± 0.84</b> | <b>0.59 ± 0.15</b> | <b>6.98 ± 0.68</b> | <b>2.98 ± 0.88</b> | <b>0.32 ± 0.11</b> | <b>1.35 ± 0.15</b> | <b>10.88 ± 0.85</b> |
| <b>Intersite CV</b> | <b>47.54%</b>      | <b>15.59%</b>      | <b>23.53%</b>      | <b>6.45%</b>        | <b>9.38%</b>       | <b>14.32%</b>      | <b>7.91%</b>       | <b>5.75%</b>       | <b>20.85%</b>      | <b>20.12%</b>      | <b>7.95%</b>       | <b>5.11%</b>        |
| S1                  | 1.30 ± 0.48        | 2.41 ± 0.76        | 0.50 ± 0.14        | 12.71 ± 0.54        | 1.50 ± 0.14        | 2.90 ± 0.61        | 0.52 ± 0.12        | 7.05 ± 0.52        | 3.56 ± 0.59        | 0.27 ± 0.05        | 1.53 ± 0.10        | 10.88 ± 1.14        |
| S2                  | 1.16 ± 0.17        | 2.34 ± 0.60        | 0.52 ± 0.08        | 12.97 ± 1.10        | 1.48 ± 0.16        | 2.34 ± 0.47        | 0.67 ± 0.20        | 7.09 ± 0.31        | 3.75 ± 0.48        | 0.30 ± 0.14        | 1.66 ± 0.22        | 11.65 ± 0.43        |
| S3                  | 1.82 ± 0.21        | 3.16 ± 0.29        | 0.44 ± 0.09        | 10.71 ± 0.74        | 1.10 ± 0.11        | 2.67 ± 0.42        | 0.59 ± 0.26        | 7.21 ± 0.45        | 2.88 ± 0.37        | 0.31 ± 0.12        | 1.47 ± 0.10        | 10.09 ± 0.67        |
| S4                  | 1.36 ± 0.23        | 3.25 ± 0.28        | 0.44 ± 0.12        | 11.86 ± 0.85        | 1.16 ± 0.07        | 2.83 ± 0.44        | 0.50 ± 0.11        | 7.06 ± 0.54        | 2.84 ± 0.35        | 0.40 ± 0.09        | 1.45 ± 0.17        | 11.46 ± 0.72        |
| S5                  | 1.46 ± 0.30        | 3.05 ± 0.66        | 0.61 ± 0.30        | 13.41 ± 0.99        | 1.50 ± 0.16        | 2.48 ± 0.52        | 0.50 ± 0.18        | 7.37 ± 0.63        | 3.24 ± 0.47        | 0.27 ± 0.08        | 1.57 ± 0.14        | 12.21 ± 0.78        |
| S6                  | 1.18 ± 0.13        | 2.72 ± 0.44        | 0.63 ± 0.19        | 13.72 ± 0.74        | 1.33 ± 0.12        | 2.56 ± 0.43        | 0.57 ± 0.11        | 7.15 ± 0.48        | 3.12 ± 0.43        | 0.30 ± 0.04        | 1.54 ± 0.20        | 12.24 ± 0.73        |
| S7                  | 1.37 ± 0.31        | 3.20 ± 0.50        | 0.49 ± 0.20        | 12.64 ± 0.79        | 1.43 ± 0.13        | 2.66 ± 0.44        | 0.57 ± 0.14        | 6.80 ± 0.39        | 2.96 ± 0.44        | 0.28 ± 0.07        | 1.52 ± 0.16        | 11.39 ± 0.87        |
| S8                  | 1.54 ± 0.18        | 2.92 ± 0.21        | 0.55 ± 0.08        | 11.29 ± 0.64        | 1.06 ± 0.10        | 2.72 ± 0.53        | 0.56 ± 0.17        | 7.20 ± 0.41        | 2.63 ± 0.30        | 0.29 ± 0.05        | 1.50 ± 0.18        | 10.90 ± 0.67        |
| <b>Siemens all</b>  | <b>1.41 ± 0.33</b> | <b>2.92 ± 0.57</b> | <b>0.52 ± 0.18</b> | <b>12.40 ± 1.25</b> | <b>1.31 ± 0.21</b> | <b>2.67 ± 0.49</b> | <b>0.55 ± 0.16</b> | <b>7.12 ± 0.49</b> | <b>3.08 ± 0.53</b> | <b>0.30 ± 0.09</b> | <b>1.52 ± 0.16</b> | <b>11.35 ± 1.04</b> |
| <b>Intersite CV</b> | <b>15.20%</b>      | <b>12.34%</b>      | <b>13.75%</b>      | <b>8.40%</b>        | <b>14.20%</b>      | <b>6.97%</b>       | <b>10.15%</b>      | <b>2.29%</b>       | <b>12.16%</b>      | <b>13.35%</b>      | <b>4.13%</b>       | <b>6.37%</b>        |
| <b>Total</b>        | <b>1.26 ± 0.71</b> | <b>2.94 ± 0.60</b> | <b>0.72 ± 0.31</b> | <b>12.22 ± 1.42</b> | <b>1.32 ± 0.28</b> | <b>2.60 ± 0.75</b> | <b>0.59 ± 0.20</b> | <b>7.05 ± 0.60</b> | <b>2.73 ± 0.85</b> | <b>0.29 ± 0.10</b> | <b>1.42 ± 0.17</b> | <b>11.18 ± 0.90</b> |

**Table E4. Site, vendor and total values (mean ± SD) of relative metabolite CRLBs in percentage**

| Site ID       | Asc                  | Asp                 | GABA                 | Glc+Tau             | Glx                | GSH                | Lac                  | ml                 | PE                   | sl                  | tCho               | tCr                | tNAA               |
|---------------|----------------------|---------------------|----------------------|---------------------|--------------------|--------------------|----------------------|--------------------|----------------------|---------------------|--------------------|--------------------|--------------------|
| G1            | 37.90 ± 15.26        | 15.17 ± 2.66        | 29.75 ± 7.33         | 17.67 ± 4.25        | 4.83 ± 0.58        | 10.08 ± 1.44       | 34.25 ± 20.01        | 4.08 ± 0.29        | 34.64 ± 17.51        | 21.00 ± 9.26        | 3.67 ± 0.49        | 1.58 ± 0.51        | 2.00 ± 0.00        |
| G2            | 62.67 ± 19.35        | 19.42 ± 4.98        | 33.58 ± 6.91         | 20.08 ± 10.90       | 4.92 ± 0.51        | 9.00 ± 1.65        | 44.20 ± 20.33        | 4.17 ± 0.39        | 29.82 ± 7.35         | 17.83 ± 6.09        | 3.33 ± 0.49        | 1.67 ± 0.49        | 1.83 ± 0.39        |
| G3            | 46.80 ± 19.38        | 14.57 ± 4.50        | 35.71 ± 20.10        | 16.86 ± 9.12        | 4.43 ± 0.53        | 8.29 ± 1.25        | 36.83 ± 10.03        | 3.71 ± 0.49        | 28.00 ± 17.29        | 24.14 ± 20.95       | 3.14 ± 0.38        | 1.14 ± 0.38        | 1.71 ± 0.49        |
| G4            | 42.75 ± 20.62        | 17.75 ± 3.57        | 40.91 ± 9.97         | 19.00 ± 4.22        | 5.08 ± 0.67        | 9.83 ± 2.86        | 52.11 ± 25.20        | 4.00 ± 0.00        | 34.82 ± 13.91        | 17.50 ± 4.30        | 3.50 ± 0.52        | 1.83 ± 0.39        | 2.00 ± 0.00        |
| G5            | 67.40 ± 24.49        | 14.50 ± 2.97        | 25.33 ± 3.31         | 16.33 ± 5.96        | 4.42 ± 0.51        | 8.67 ± 1.15        | 29.33 ± 9.56         | 3.83 ± 0.39        | 25.75 ± 5.14         | 17.75 ± 5.56        | 3.08 ± 0.29        | 1.17 ± 0.39        | 1.92 ± 0.29        |
| G6            | 55.75 ± 25.64        | 14.75 ± 2.26        | 38.50 ± 20.22        | 21.25 ± 9.04        | 4.33 ± 0.49        | 7.33 ± 0.89        | 48.36 ± 20.73        | 4.00 ± 0.00        | 30.17 ± 10.72        | 25.18 ± 9.77        | 3.67 ± 0.65        | 1.92 ± 0.29        | 1.92 ± 0.29        |
| G7            | 40.67 ± 15.63        | 16.17 ± 6.78        | 32.82 ± 7.87         | 14.92 ± 6.42        | 4.92 ± 0.79        | 12.08 ± 6.01       | 31.36 ± 16.05        | 3.92 ± 0.51        | 36.73 ± 23.66        | 23.09 ± 6.74        | 3.42 ± 0.51        | 1.42 ± 0.51        | 1.83 ± 0.39        |
| G8            | 30.50 ± 12.46        | 17.33 ± 4.10        | 44.27 ± 23.56        | 15.33 ± 4.75        | 4.92 ± 0.67        | 12.25 ± 5.21       | 42.17 ± 17.59        | 3.83 ± 0.58        | 31.46 ± 13.22        | 22.58 ± 5.99        | 3.33 ± 0.49        | 1.67 ± 0.49        | 1.75 ± 0.45        |
| <b>GE all</b> | <b>44.48 ± 20.31</b> | <b>16.30 ± 4.37</b> | <b>34.93 ± 14.52</b> | <b>17.73 ± 7.16</b> | <b>4.75 ± 0.64</b> | <b>9.77 ± 3.52</b> | <b>39.76 ± 19.02</b> | <b>3.96 ± 0.39</b> | <b>31.54 ± 14.22</b> | <b>20.90 ± 8.96</b> | <b>3.41 ± 0.52</b> | <b>1.57 ± 0.50</b> | <b>1.88 ± 0.33</b> |
| P1            | 13.92 ± 2.15         | 9.58 ± 0.79         | 28.08 ± 6.67         | 9.00 ± 0.85         | 4.00 ± 0.00        | 7.33 ± 0.65        | 21.92 ± 7.53         | 3.67 ± 0.49        | 17.83 ± 3.71         | 10.67 ± 2.42        | 2.08 ± 0.29        | 1.00 ± 0.00        | 1.00 ± 0.00        |
| P2            | 18.75 ± 11.92        | 10.08 ± 1.16        | 25.75 ± 5.82         | 10.25 ± 1.82        | 4.33 ± 0.49        | 7.67 ± 0.78        | 21.08 ± 5.45         | 3.83 ± 0.39        | 13.00 ± 2.30         | 12.08 ± 4.83        | 2.00 ± 0.00        | 1.00 ± 0.00        | 1.83 ± 0.39        |
| P3            | 40.13 ± 17.13        | 18.25 ± 4.61        | 36.83 ± 11.00        | 15.42 ± 4.58        | 5.17 ± 0.39        | 8.08 ± 1.08        | 38.73 ± 16.38        | 4.00 ± 0.00        | 22.58 ± 8.10         | 14.08 ± 3.26        | 2.83 ± 0.39        | 1.25 ± 0.45        | 2.00 ± 0.00        |
| P4            | 18.83 ± 10.95        | 10.92 ± 2.78        | 32.10 ± 5.65         | 12.67 ± 13.38       | 4.25 ± 0.75        | 7.25 ± 1.82        | 21.25 ± 8.90         | 3.50 ± 0.67        | 14.25 ± 4.33         | 12.58 ± 5.48        | 2.33 ± 0.49        | 1.17 ± 0.39        | 1.42 ± 0.51        |
| P5            | 48.00 ± 26.66        | 9.38 ± 1.06         | 28.88 ± 5.44         | 15.25 ± 3.77        | 4.50 ± 0.53        | 7.00 ± 1.07        | 24.25 ± 7.72         | 3.63 ± 0.52        | 22.50 ± 5.55         | 19.00 ± 7.54        | 2.50 ± 0.53        | 1.00 ± 0.00        | 1.50 ± 0.53        |
| P6            | 14.75 ± 6.12         | 13.92 ± 4.62        | 22.58 ± 3.32         | 11.33 ± 3.47        | 4.42 ± 0.67        | 7.17 ± 1.19        | 29.50 ± 16.20        | 3.92 ± 0.51        | 19.17 ± 12.15        | 16.08 ± 4.44        | 2.50 ± 0.67        | 1.08 ± 0.29        | 1.58 ± 0.51        |
| P7            | 46.00 ± 20.48        | 9.17 ± 0.94         | 29.64 ± 11.27        | 14.33 ± 3.70        | 4.83 ± 0.39        | 7.42 ± 0.79        | 33.73 ± 12.36        | 3.75 ± 0.45        | 17.25 ± 5.29         | 13.25 ± 2.73        | 2.83 ± 0.39        | 1.08 ± 0.29        | 1.83 ± 0.39        |
| P8            | 17.00 ± 6.42         | 8.08 ± 0.51         | 30.50 ± 13.81        | 10.08 ± 1.83        | 4.00 ± 0.00        | 5.92 ± 0.29        | 20.08 ± 6.29         | 3.00 ± 0.00        | 12.83 ± 1.34         | 9.58 ± 1.16         | 2.00 ± 0.00        | 1.00 ± 0.00        | 1.25 ± 0.45        |
| P9            | 40.00 ± 20.80        | 10.00 ± 0.60        | 25.67 ± 4.94         | 10.25 ± 1.48        | 4.00 ± 0.00        | 6.25 ± 0.87        | 19.83 ± 3.76         | 3.08 ± 0.29        | 13.50 ± 1.62         | 9.83 ± 1.59         | 2.00 ± 0.00        | 1.00 ± 0.00        | 1.00 ± 0.00        |
| P10           | 26.64 ± 10.81        | 13.58 ± 2.39        | 34.09 ± 10.25        | 21.00 ± 23.58       | 5.50 ± 0.90        | 9.08 ± 1.93        | 40.75 ± 14.40        | 4.33 ± 0.49        | 20.58 ± 10.90        | 23.64 ± 11.59       | 3.00 ± 0.00        | 1.67 ± 0.49        | 1.92 ± 0.29        |

|                    |                      |                     |                      |                     |                    |                    |                      |                    |                      |                     |                    |                    |                    |
|--------------------|----------------------|---------------------|----------------------|---------------------|--------------------|--------------------|----------------------|--------------------|----------------------|---------------------|--------------------|--------------------|--------------------|
| <b>Philips all</b> | <b>25.85 ± 17.81</b> | <b>11.36 ± 3.81</b> | <b>29.34 ± 9.20</b>  | <b>12.88 ± 9.42</b> | <b>4.50 ± 0.70</b> | <b>7.33 ± 1.40</b> | <b>27.05 ± 12.95</b> | <b>3.67 ± 0.57</b> | <b>17.17 ± 7.29</b>  | <b>13.83 ± 6.47</b> | <b>2.41 ± 0.51</b> | <b>1.13 ± 0.34</b> | <b>1.53 ± 0.50</b> |
| S1                 | 23.25 ± 12.51        | 16.42 ± 6.08        | 40.90 ± 14.02        | 10.92 ± 1.68        | 4.25 ± 0.62        | 6.83 ± 1.11        | 32.08 ± 18.43        | 3.25 ± 0.45        | 15.17 ± 5.67         | 13.58 ± 4.48        | 2.25 ± 0.45        | 1.08 ± 0.29        | 1.67 ± 0.49        |
| S2                 | 24.00 ± 4.42         | 18.60 ± 9.29        | 44.40 ± 12.05        | 14.00 ± 3.08        | 4.40 ± 0.55        | 7.60 ± 0.89        | 25.80 ± 6.80         | 3.20 ± 0.45        | 15.20 ± 1.64         | 14.80 ± 8.44        | 2.20 ± 0.45        | 1.20 ± 0.45        | 2.00 ± 0.00        |
| S3                 | 13.36 ± 1.91         | 10.82 ± 1.40        | 40.27 ± 9.03         | 11.09 ± 2.39        | 4.45 ± 0.52        | 8.36 ± 1.03        | 23.70 ± 7.70         | 3.18 ± 0.40        | 15.46 ± 2.70         | 11.73 ± 3.90        | 2.09 ± 0.30        | 1.09 ± 0.30        | 1.64 ± 0.50        |
| S4                 | 15.33 ± 2.39         | 9.58 ± 1.08         | 37.92 ± 19.36        | 9.67 ± 1.61         | 4.00 ± 0.43        | 7.00 ± 0.74        | 22.42 ± 5.99         | 2.92 ± 0.29        | 13.67 ± 1.78         | 8.25 ± 1.91         | 2.08 ± 0.29        | 1.00 ± 0.00        | 1.25 ± 0.45        |
| S5                 | 19.64 ± 6.85         | 13.08 ± 4.32        | 38.00 ± 15.90        | 13.33 ± 2.81        | 4.08 ± 0.29        | 7.08 ± 1.16        | 34.58 ± 20.97        | 3.33 ± 0.49        | 16.17 ± 1.85         | 14.67 ± 6.96        | 2.08 ± 0.29        | 1.08 ± 0.29        | 1.67 ± 0.49        |
| S6                 | 19.83 ± 2.44         | 12.42 ± 2.11        | 30.00 ± 9.62         | 10.92 ± 1.44        | 3.58 ± 0.51        | 6.92 ± 0.29        | 22.33 ± 5.14         | 3.00 ± 0.00        | 13.75 ± 1.60         | 10.58 ± 1.51        | 2.00 ± 0.00        | 1.00 ± 0.00        | 1.17 ± 0.39        |
| S7                 | 15.82 ± 3.25         | 9.64 ± 1.69         | 38.55 ± 21.31        | 9.82 ± 1.60         | 3.45 ± 0.52        | 6.09 ± 0.54        | 21.55 ± 9.55         | 3.00 ± 0.45        | 13.55 ± 1.86         | 10.91 ± 2.81        | 2.00 ± 0.00        | 1.00 ± 0.00        | 1.18 ± 0.40        |
| S8                 | 13.73 ± 1.85         | 10.64 ± 0.92        | 27.27 ± 4.67         | 10.00 ± 2.00        | 4.09 ± 0.30        | 7.91 ± 0.54        | 20.46 ± 5.09         | 3.00 ± 0.00        | 14.36 ± 1.63         | 10.27 ± 2.10        | 2.00 ± 0.00        | 1.00 ± 0.00        | 1.09 ± 0.30        |
| <b>Siemens all</b> | <b>17.75 ± 6.66</b>  | <b>12.24 ± 4.48</b> | <b>36.58 ± 14.75</b> | <b>11.02 ± 2.40</b> | <b>4.01 ± 0.56</b> | <b>7.19 ± 1.05</b> | <b>25.47 ± 12.62</b> | <b>3.10 ± 0.38</b> | <b>14.63 ± 2.82</b>  | <b>11.64 ± 4.55</b> | <b>2.08 ± 0.28</b> | <b>1.05 ± 0.21</b> | <b>1.42 ± 0.50</b> |
| <b>Total</b>       | <b>27.02 ± 18.34</b> | <b>13.15 ± 4.69</b> | <b>33.18 ± 13.09</b> | <b>13.84 ± 7.74</b> | <b>4.43 ± 0.71</b> | <b>8.04 ± 2.50</b> | <b>30.18 ± 15.99</b> | <b>3.59 ± 0.58</b> | <b>20.67 ± 11.58</b> | <b>15.35 ± 7.85</b> | <b>2.62 ± 0.71</b> | <b>1.24 ± 0.43</b> | <b>1.61 ± 0.49</b> |

**Table E5. Site between-participant coefficients of variation (CVs) and vendor-mean between-participant CVs for quantified metabolites in percentage**

| Site ID             | Asc/tCr      | Asp/tCr      | GABA/tCr     | Glc+Tau/tCr  | Glx/tCr     | GSH/tCr      | Lac/tCr      | ml/tCr      | PE/tCr       | sl/tCr       | tCho/tCr    | tNAA/tCr    |
|---------------------|--------------|--------------|--------------|--------------|-------------|--------------|--------------|-------------|--------------|--------------|-------------|-------------|
| G1                  | 38.45        | 14.11        | 28.93        | 29.51        | 10.63       | 14.12        | 51.74        | 9.6         | 31.91        | 38.82        | 12.16       | 12.08       |
| G2                  | 28.22        | 17.15        | 26.29        | 38.9         | 9.22        | 14.15        | 36.87        | 6.87        | 25.72        | 40.31        | 8.26        | 4.64        |
| G3                  | 33.71        | 16.55        | 47.96        | 31.14        | 8.3         | 19.6         | 18.45        | 4.25        | 35.68        | 60.58        | 9.49        | 6.4         |
| G4                  | 58.83        | 19.89        | 32.85        | 20.54        | 5.21        | 16.71        | 50.83        | 7.95        | 25.56        | 22.01        | 8.16        | 5.18        |
| G5                  | 29.99        | 21.1         | 22.64        | 25.54        | 6.25        | 11.61        | 25.78        | 7.18        | 23.59        | 37.41        | 6.72        | 5.05        |
| G6                  | 47.42        | 14.66        | 35.31        | 31.7         | 6.98        | 11.24        | 39.95        | 6.23        | 29.2         | 56.15        | 13.84       | 5.38        |
| G7                  | 77.75        | 17.63        | 24.18        | 25.49        | 11.01       | 29.85        | 44.48        | 5.78        | 40.22        | 45.61        | 13.02       | 5.39        |
| G8                  | 35.96        | 23.22        | 42.33        | 39.06        | 14.4        | 30.31        | 60.04        | 8.92        | 37.06        | 24.24        | 6.64        | 4.46        |
| <b>GE Mean</b>      | <b>43.79</b> | <b>18.04</b> | <b>32.56</b> | <b>30.23</b> | <b>9</b>    | <b>18.45</b> | <b>41.02</b> | <b>7.1</b>  | <b>31.12</b> | <b>40.64</b> | <b>9.79</b> | <b>6.07</b> |
| P1                  | 16.82        | 7.16         | 17.58        | 13.13        | 7           | 6.89         | 21.12        | 8.06        | 22.91        | 27.09        | 9.58        | 7.36        |
| P2                  | 38.39        | 8.55         | 13.93        | 15.42        | 7.8         | 10.14        | 21.39        | 6.09        | 18.3         | 36.47        | 7.97        | 6.52        |
| P3                  | 46.5         | 20.67        | 33.98        | 24.63        | 8.17        | 12.98        | 32.11        | 7.19        | 25.31        | 23.44        | 7.47        | 10.4        |
| P4                  | 33.38        | 8.7          | 22.7         | 25.79        | 7.5         | 8.19         | 19.48        | 12.08       | 18.36        | 43.52        | 9.92        | 6.12        |
| P5                  | 47.59        | 8.28         | 22.27        | 20.12        | 8.42        | 23.89        | 28.37        | 6.6         | 26.91        | 32.47        | 15.06       | 3.24        |
| P6                  | 79.17        | 23.57        | 25.39        | 52.09        | 7.25        | 37.58        | 31.18        | 12.27       | 31           | 19.95        | 7.57        | 6.18        |
| P7                  | 39.08        | 10.52        | 53.85        | 21.12        | 12.41       | 9.54         | 32.19        | 7.75        | 25.34        | 29.78        | 7.95        | 5.17        |
| P8                  | 29.18        | 7.58         | 39.2         | 12.16        | 6.6         | 6.03         | 27.94        | 6.07        | 20.34        | 15.71        | 4.04        | 3.5         |
| P9                  | 42.49        | 10.21        | 21.95        | 13.92        | 5.62        | 14.02        | 19.29        | 7.14        | 20.29        | 23.32        | 10.82       | 6.15        |
| P10                 | 59.48        | 14.23        | 37.74        | 42.21        | 10.75       | 24.6         | 24.75        | 8.54        | 25.27        | 46.03        | 9.43        | 4.49        |
| <b>Philips Mean</b> | <b>43.21</b> | <b>11.95</b> | <b>28.86</b> | <b>24.06</b> | <b>8.15</b> | <b>15.39</b> | <b>25.78</b> | <b>8.18</b> | <b>23.4</b>  | <b>29.78</b> | <b>8.98</b> | <b>5.91</b> |
| S1                  | 36.45        | 31.4         | 27.24        | 20.93        | 4.23        | 9.4          | 23.17        | 7.32        | 16.63        | 17.83        | 6.42        | 10.47       |

|                     |              |              |              |              |             |             |             |             |              |              |              |             |
|---------------------|--------------|--------------|--------------|--------------|-------------|-------------|-------------|-------------|--------------|--------------|--------------|-------------|
| S2                  | 14.65        | 25.53        | 15.52        | 20.23        | 8.46        | 11.02       | 30.08       | 4.43        | 12.78        | 46.21        | 13.27        | 3.7         |
| S3                  | 11.32        | 9.01         | 20.33        | 15.66        | 6.86        | 10.24       | 44.09       | 6.19        | 12.9         | 39.56        | 7.07         | 6.69        |
| S4                  | 17.12        | 8.67         | 27.72        | 15.43        | 7.16        | 6.13        | 22.87       | 7.61        | 12.37        | 21.63        | 11.7         | 6.24        |
| S5                  | 20.47        | 21.71        | 48.54        | 21.01        | 7.35        | 11.01       | 35.88       | 8.5         | 14.61        | 28.31        | 8.66         | 6.36        |
| S6                  | 11.14        | 16.35        | 30.8         | 16.76        | 5.41        | 8.69        | 18.53       | 6.65        | 13.79        | 14.66        | 12.86        | 5.94        |
| S7                  | 22.7         | 15.77        | 40.77        | 16.46        | 6.26        | 8.88        | 24.82       | 5.69        | 14.84        | 25.74        | 10.8         | 7.61        |
| S8                  | 11.99        | 7.26         | 14.93        | 19.41        | 5.67        | 9.12        | 30.15       | 5.73        | 11.24        | 17.16        | 12.25        | 6.17        |
| <b>Siemens Mean</b> | <b>18.23</b> | <b>16.96</b> | <b>28.23</b> | <b>18.23</b> | <b>6.42</b> | <b>9.31</b> | <b>28.7</b> | <b>6.51</b> | <b>13.65</b> | <b>26.39</b> | <b>10.38</b> | <b>6.65</b> |

**Table E6. Variance partition coefficients (shown as percentages) for site-, vendor- and participant-level effects for the metabolite ratios**

| Metabolite  |         |            |          |             |         |            |         |            |        |        |          |          |
|-------------|---------|------------|----------|-------------|---------|------------|---------|------------|--------|--------|----------|----------|
|             | Asc/tCr | Asp/tCr    | GABA/tCr | Glc+Tau/tCr | Glx/tCr | GSH/tCr    | Lac/tCr | ml/tCr     | PE/tCr | sl/tCr | tCho/tCr | tNAA/tCr |
| Vendor      | 6.40%   | Negligible | 23.2%*   | 9.7%*       | 6.20%   | Negligible | 0.50%   | Negligible | 27.1%* | 6.0%*  | 16.0%    | 3.50%    |
| Site        | 25.7%*  | 41.2%*     | 13.4%*   | 7.2%*       | 44.2%*  | 37.7%*     | 3.20%   | 17.1%*     | 21.4%* | 13.4%* | 15.3%    | 29.4%    |
| Participant | 67.90%  | 58.80%     | 63.40%   | 83.10%      | 49.70%  | 62.30%     | 96.40%  | 82.90%     | 51.50% | 80.60% | 68.70%   | 67.10%   |

| Macromolecule |            |          |          |          |          |
|---------------|------------|----------|----------|----------|----------|
|               | MM09/tCr   | MM20/tCr | MM12/tCr | MM14/tCr | MM17/tCr |
| Vendor        | Negligible | 0.03     | 0.009    | 0.046    | 8.6%*    |
| Site          | 13.8%*     | 37.8%*   | 5.9%*    | 14.6%*   | 0.024    |
| Participant   | 0.862      | 0.592    | 0.931    | 0.808    | 0.891    |

\* Significant based on linear mixed effect modeling ( $P < .05$ ).
